# Supplementary material for: A novel polynorbornene-based chemosensor for the fluorescence sensing of Zn2+ and Cd2+ and subsequent detection of pyrophosphate in aqueous solutions
Source: Royal Society of Chemistry journal article supplement (doi:10.1039/c5dt00542f), 2015-01-01
Supplement: c5dt00542f1.pdf [file c5dt00542f1.pdf]

**A novel polynoborn-base chemosensor fluorescence sensing of Zn<sup>2+</sup>  
and Cd<sup>2+</sup> and subsequent pyrophosphate in absolute aqueous solution**

Pei-Shui Yao,<sup>†</sup> Zhanghua Liu,<sup>‡</sup> Jin-Zhu Ge,<sup>†</sup> Yong Chen,<sup>‡</sup> Qian-Yong Cao<sup>†,\*</sup>

<sup>†</sup>Department of Chemistry and <sup>‡</sup>Institute for Advanced Study, Nanchang University,  
Nanchang 330031, P. R. China

*Fax: (+86)791-83969386; E-mail: [cqyong@ncu.edu.cn](mailto:cqyong@ncu.edu.cn)*

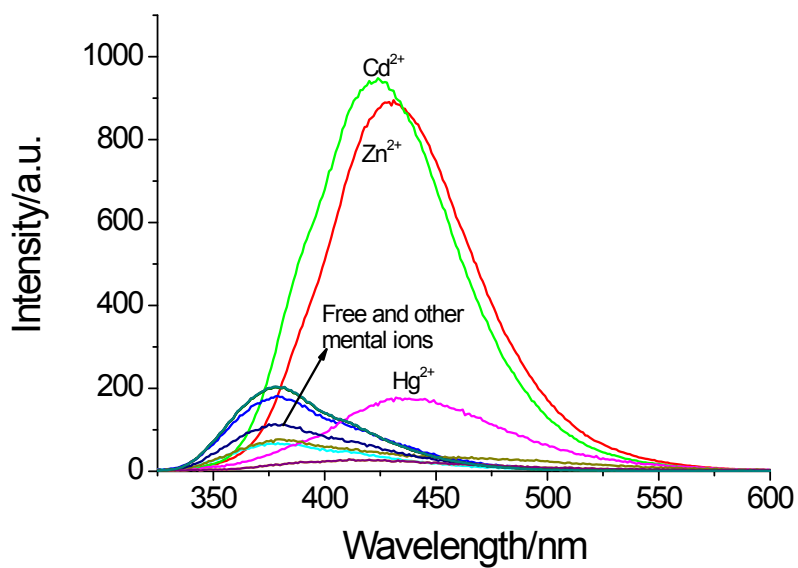

**Figure S1.** Emission spectra of **1** upon the addition of various metal ions (2 equiv) in CH<sub>3</sub>CN solution

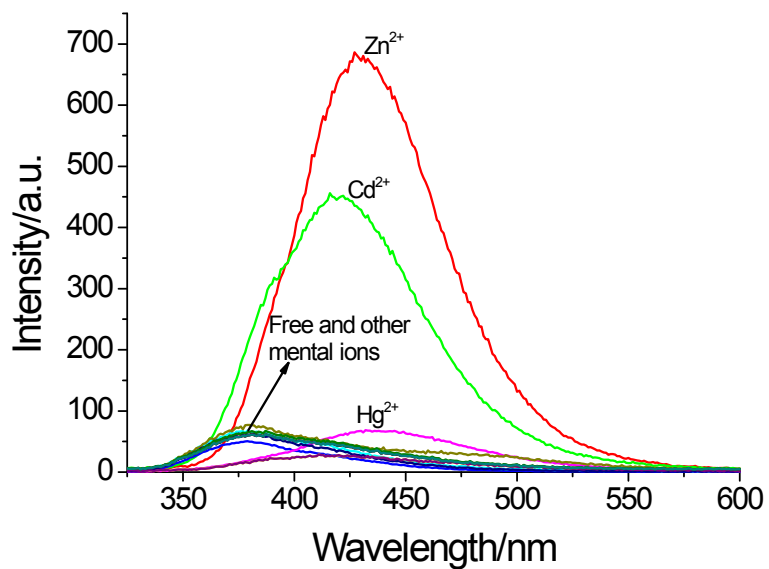

**Figure S2** Emission spectra of **P1** upon the addition of various metal ions (2 equiv) in CH<sub>3</sub>CN solution.

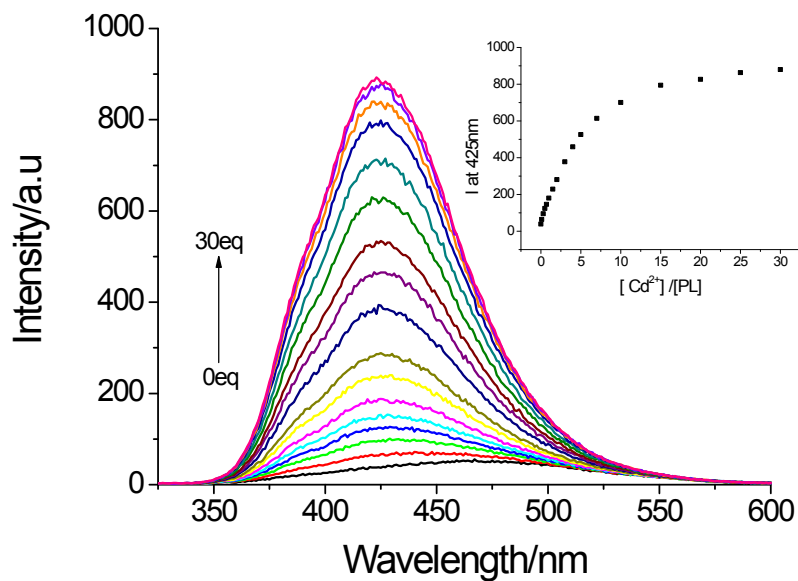

**Figure S3.** Emission titration of **P1** (20 mM) upon the addition of various Cd<sup>2+</sup> ions in Tris-HCl solution (pH = 7.4). Inset: emission intensity at 425 nm upon titration with Cd<sup>2+</sup>.

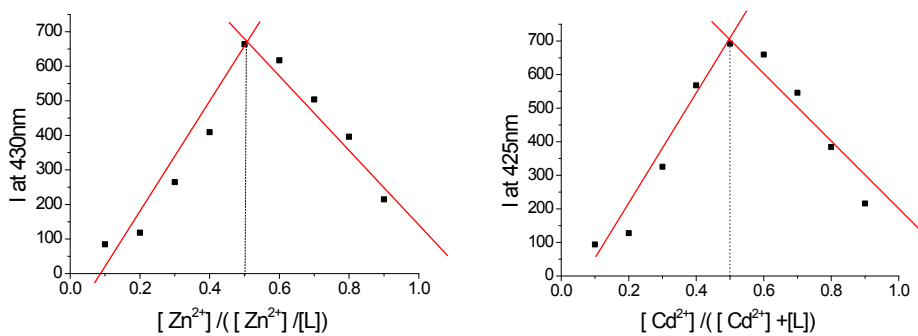

**Figure S4.** Job plots of **P1** with Zn<sup>2+</sup> (left) and Cd<sup>2+</sup> (right).

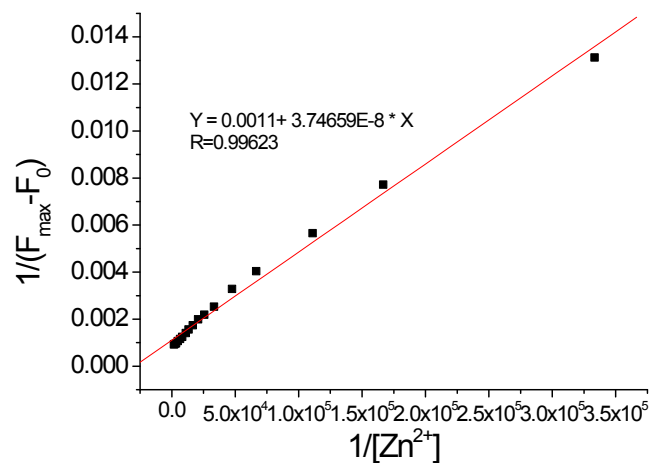

**Figure S5.** The calculated binding constants of **P1-Zn<sup>2+</sup>**.

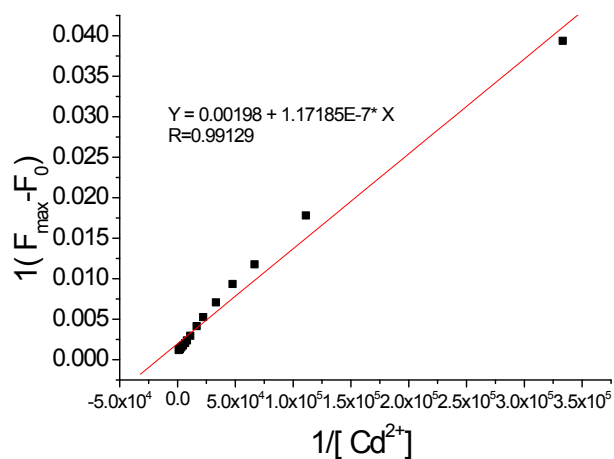

**Figure S6.** The calculated binding constants of **P1-Cd<sup>2+</sup>**.

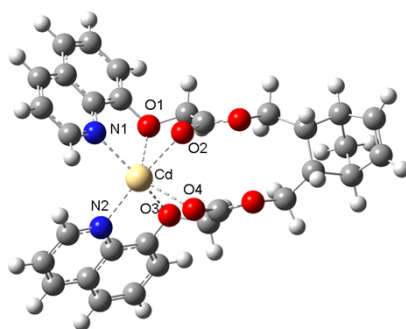

**Figure S7.** Optimized conformation of **1**-Cd<sup>2+</sup> by DFT calculation. Selected distances (Å): Cd–N1, 2.320; Zn–N2, 2.328; Zn–O1, 2.478; Zn–O2, 2.366; Zn–O3, 2.512; Zn–O4, 2.324.

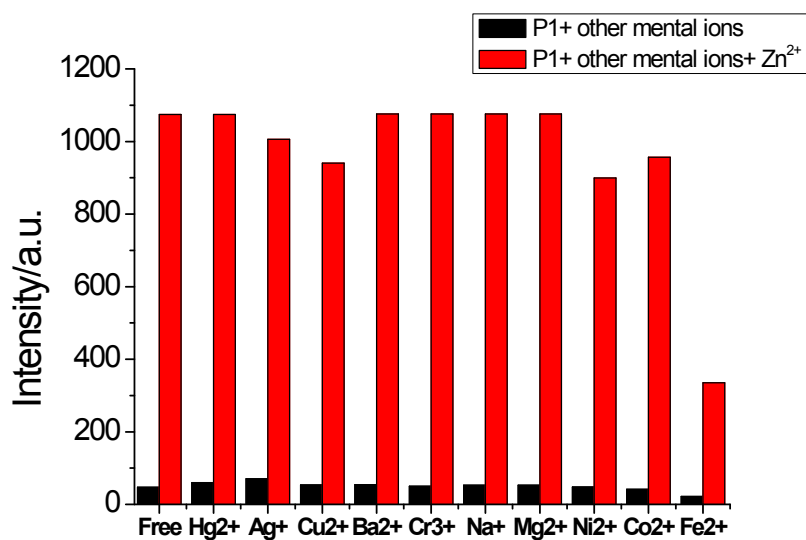

**Figure S8.** Competition experiments

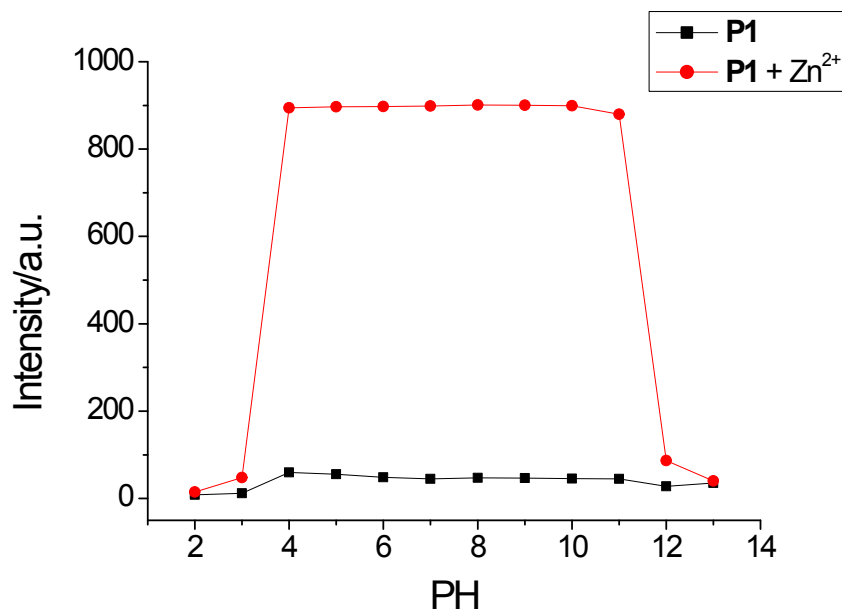

**Figure S9.** Fluorescence intensities of **P1** (20  $\mu\text{m}$ ) at 425 nm before and after the additional of  $\text{Zn}^{2+}$  (5 equiv) at various pH values in  $\text{H}_2\text{O}$  solution.

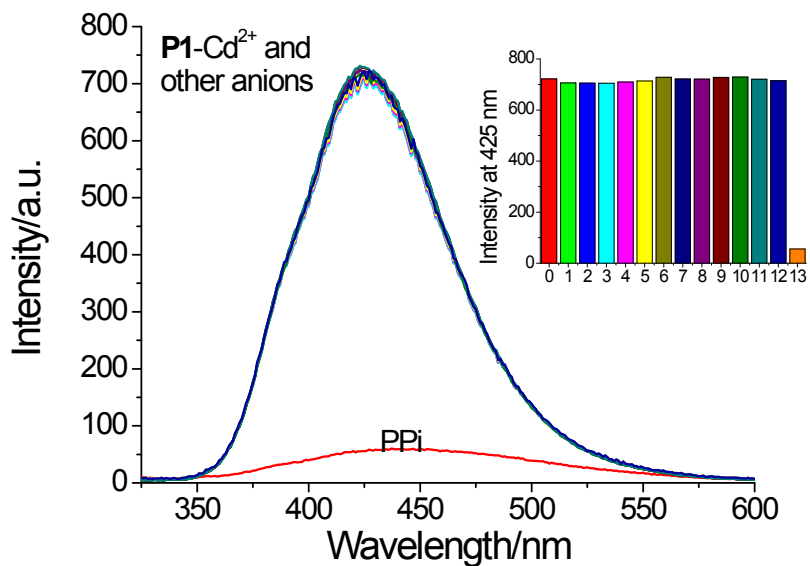

**Figure S10.** The emission spectra of **P1-Cd<sup>2+</sup>** upon the addition of various anions (20 equiv) in aqueous solution. Inset shows the emission intensity at 425 nm upon the addition of various anions (0-**P1-Cd<sup>2+</sup>**, 1- $\text{F}^-$ , 2- $\text{Cl}^-$ , 3- $\text{Br}^-$ , 4- $\text{I}^-$ , 5- $\text{NO}_3^-$ , 6- $\text{CH}_3\text{COO}^-$ , 7- $\text{CO}_3^{2-}$ , 8- $\text{HSO}_4^-$ , 9- $\text{Pi}$ , 10- $\text{ATP}$ , 11- $\text{AMP}$ , 12- $\text{ADP}$ , 13- $\text{PPI}$ ).

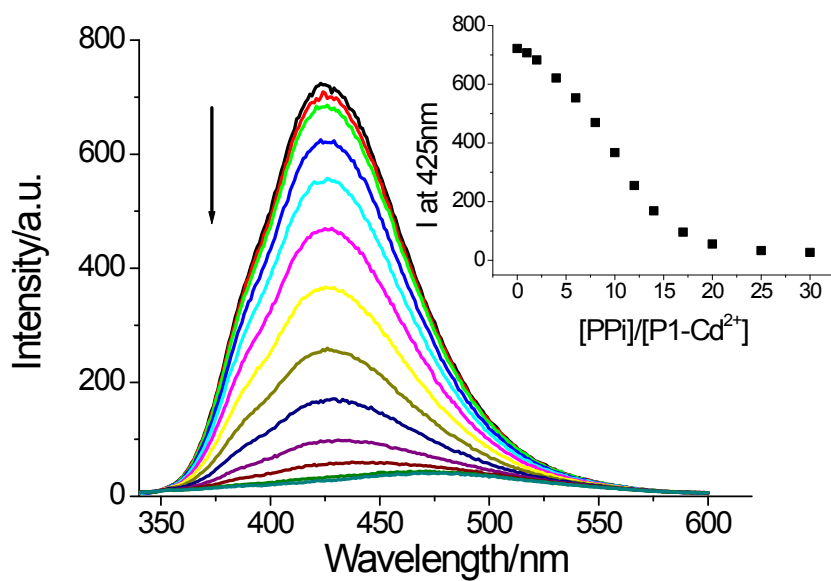

**Figure S11.** The emission titration of **P1-Cd<sup>2+</sup>** upon the addition of PPI in 100% aqueous solution

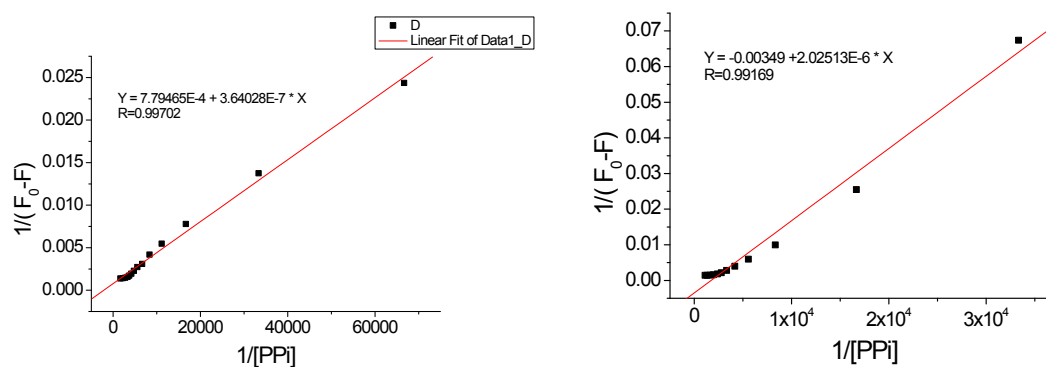

**Figure S12.** Benesi-Hildebrand plot of for evaluation of binding constants of PPI with **P1-Zn<sup>2+</sup>** (left) and **P1-Cd<sup>2+</sup>** (right) with the 1:1 binding stoichiometry in aqueous (PH-7.4) solution.

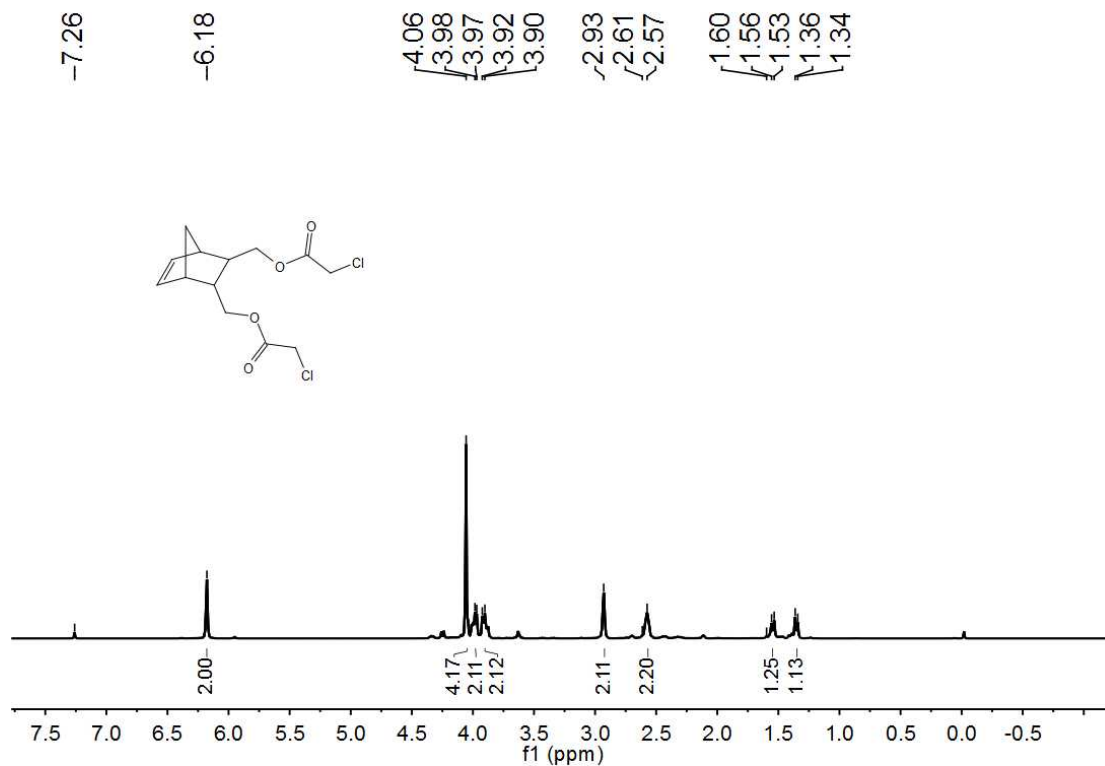

Figure S13. <sup>1</sup>H-NMR of **4** in CDCl<sub>3</sub> solution

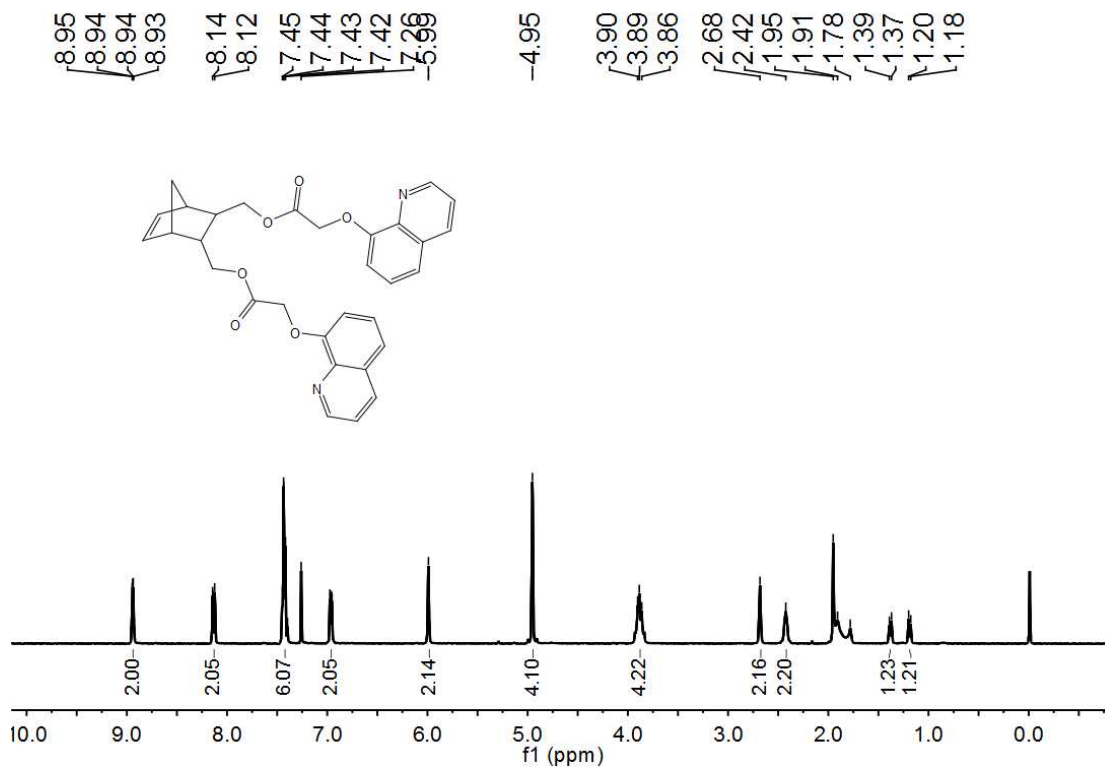

Figure S14. <sup>1</sup>H-NMR of **1** in CDCl<sub>3</sub> solution



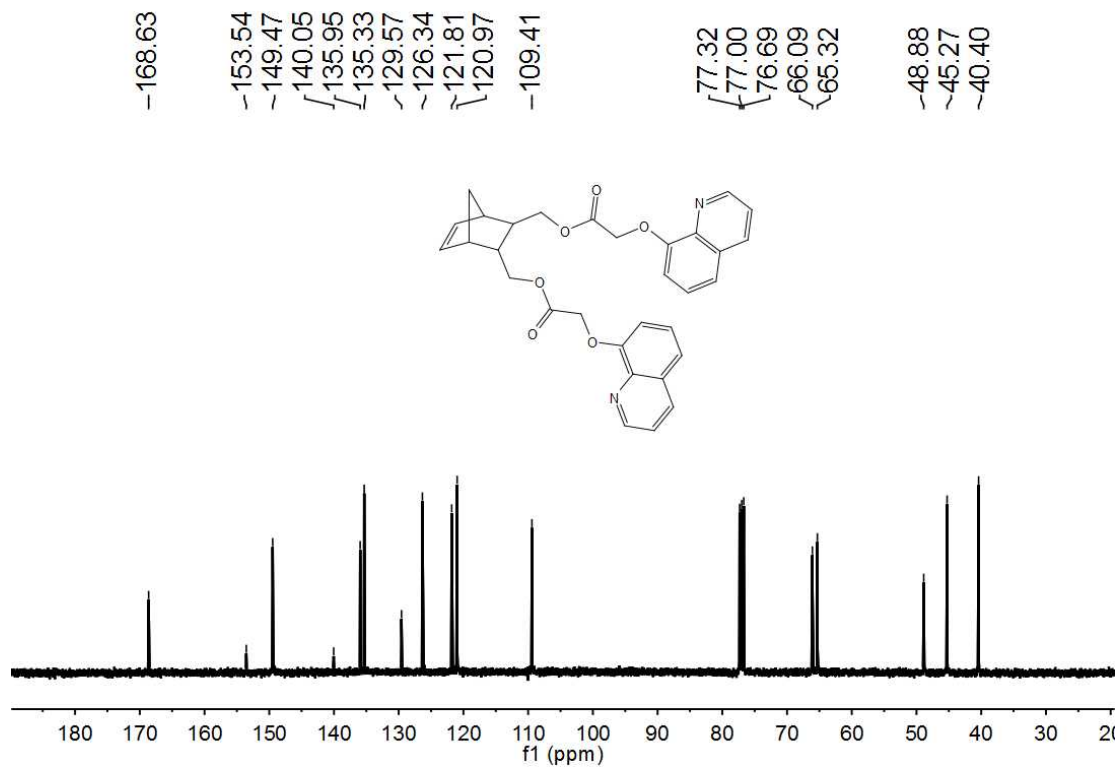

Figure S15. <sup>13</sup>C-NMR of **1** in CDCl<sub>3</sub> solution.

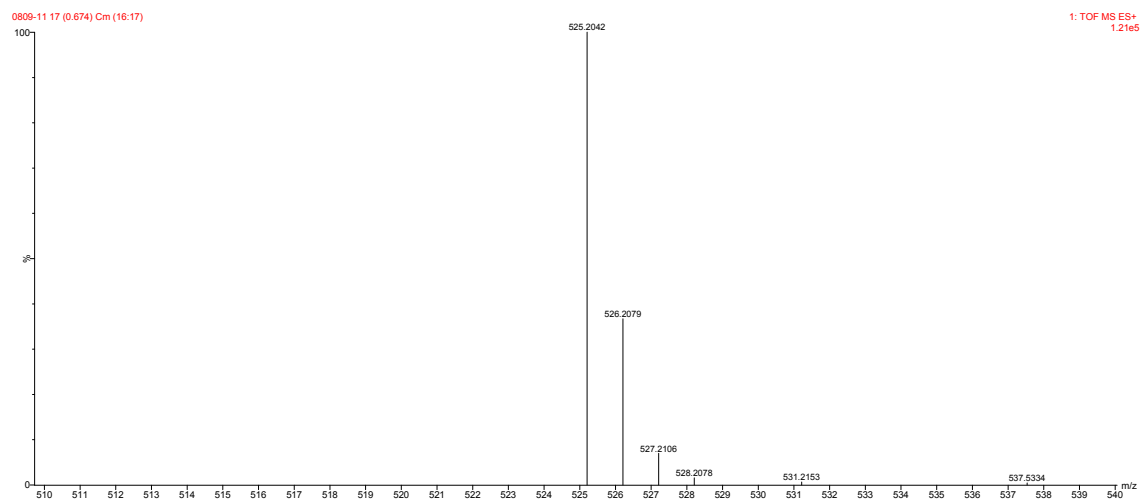

Figure S16. ESI-MS of **1**.

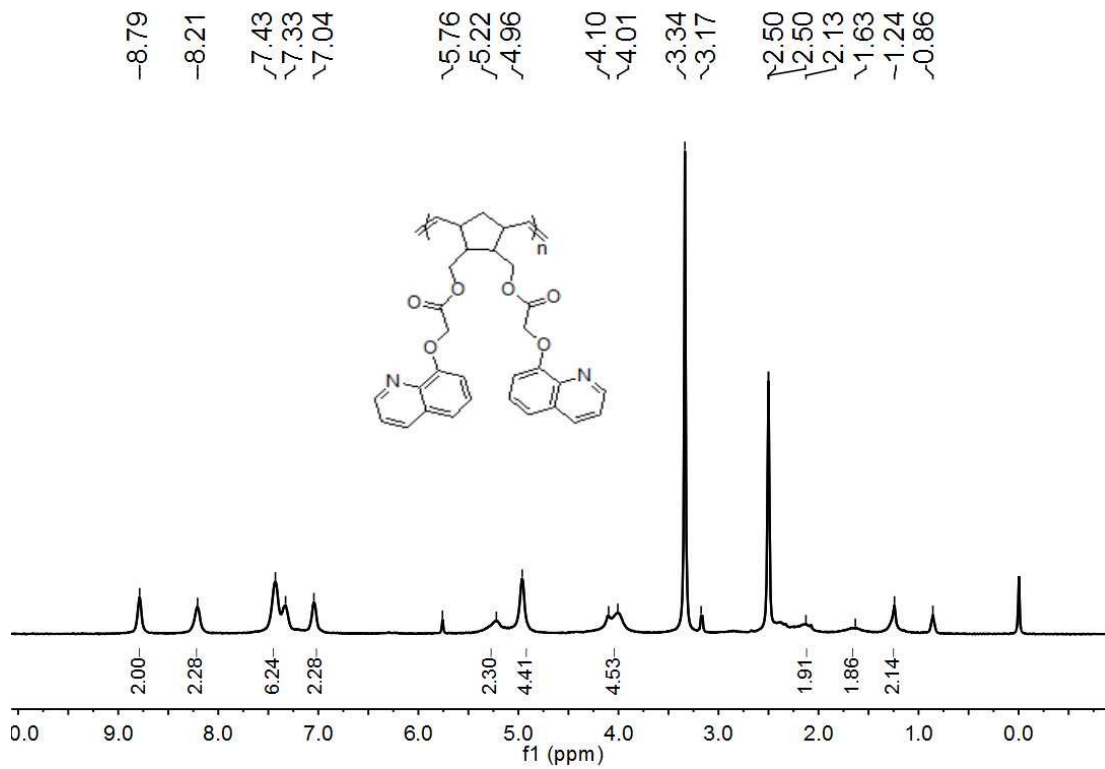

**Figure S17.**  $^1\text{H-NMR}$  of **P1** in DMSO.
